# Supplementary material
Source: PubMed Central journal article supplement (PMC2904131)
Supplement: 00620.2009_1.pdf [file 00620.2009_1.pdf]

a) Extracellular Domain

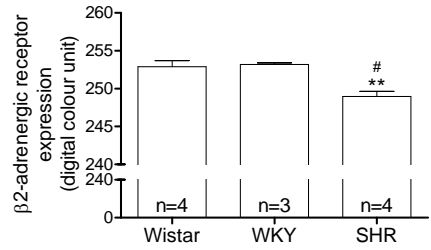

b) Intracellular Domain

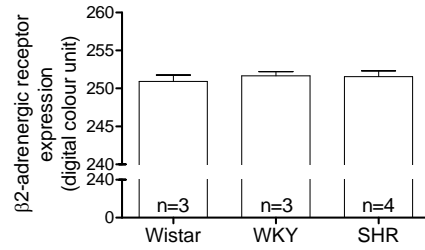

c) Extracellular Domain

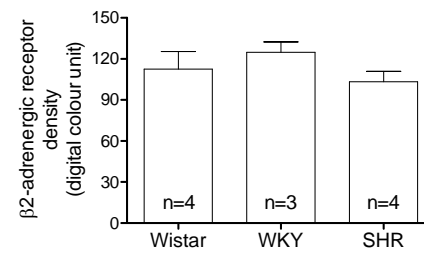

d) Intracellular Domain

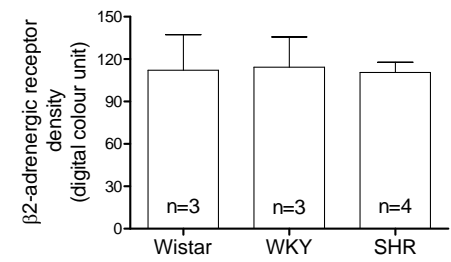

e)

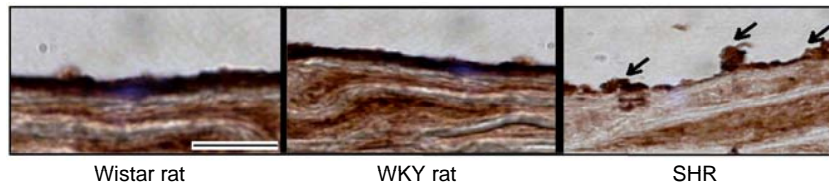

f)

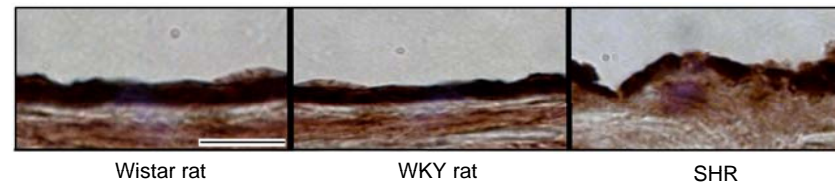

g)

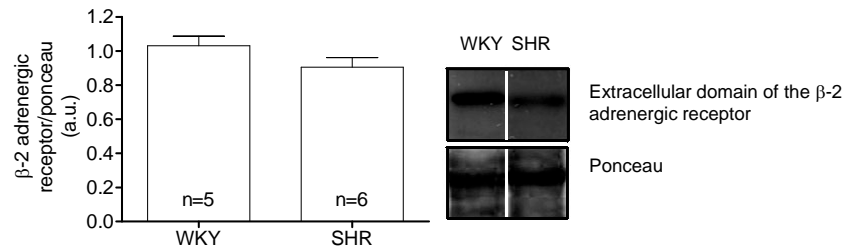

h)

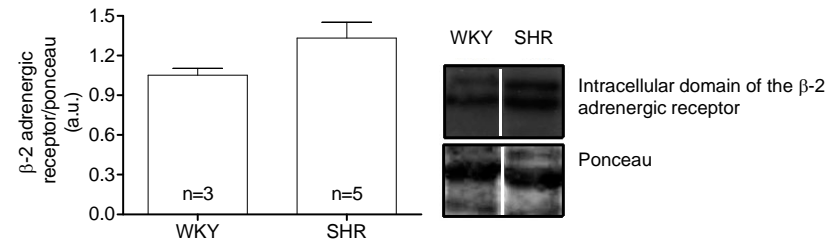

a) Extracellular Domain

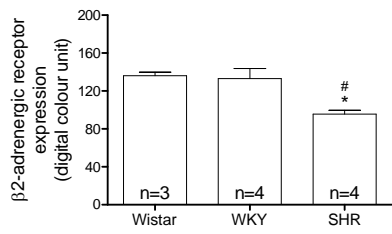

b) Intracellular Domain

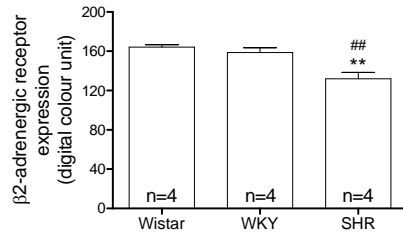

c)

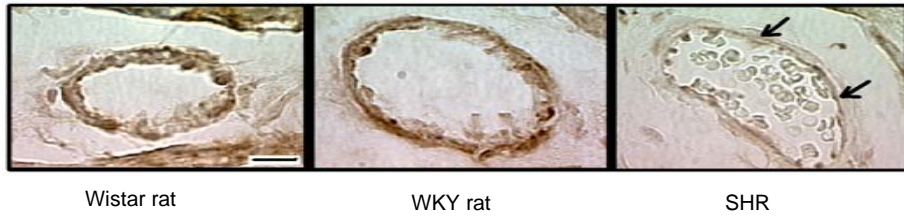

Wistar rat

WKY rat

SHR

d)

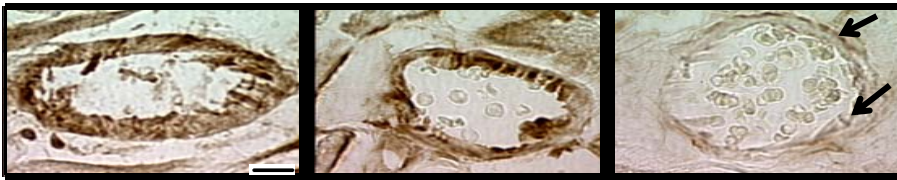

Wistar rat

WKY rat

SHR

e)

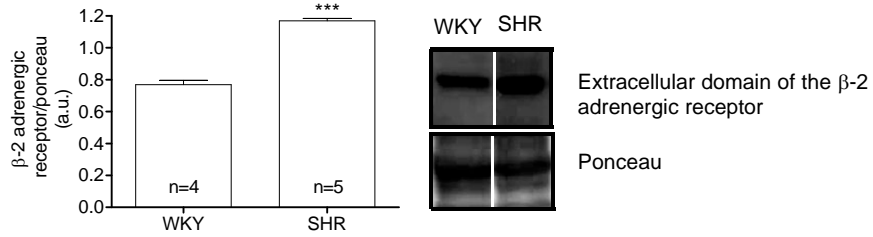

WKY SHR

Extracellular domain of the  $\beta$ -2 adrenergic receptor

Ponceau

f)

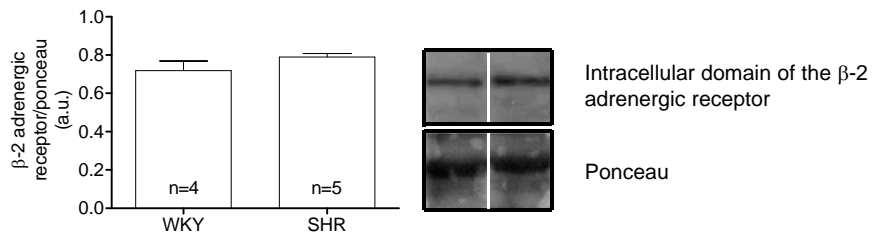

Intracellular domain of the  $\beta$ -2 adrenergic receptor

Ponceau

**Figure 4.** Mean  $\pm$  SEM of the density values (in digital optical units) of the extracellular and intracellular domains of the  $\beta_2$ AR at basal level in the thoracic aorta endothelium layer (a, b) and smooth muscle cells layer (c, d) from control Wistar, WKY rats and SHR. Representative micrographs showing the intensity of the avidin-biotin-diaminobenzidine immuno-complexes for both the extracellular (e) and intracellular (f) domains of the  $\beta_2$ AR at basal level in thoracic aorta endothelial cells and smooth muscle cell layers for the same strains. Representative Western blots showing the expression of the  $\beta_2$ AR extracellular (g) and intracellular domains (h) and corresponding ponceau at basal level in thoracic aorta from control WKY and SHR. The blots were selected as closest to the measured mean values from a single Western gel for all WKY and SHR samples and are separated by white space. For this, 40  $\mu$ g of proteins was used. Numbers in the bars indicate rat group sizes. \*\* P < 0.01 vs Wistar; # P < 0.05 vs WKY. Bar = 20  $\mu$ m.

**Figure 5.** Mean  $\pm$  SEM of the optical density values (in digital units) of the extracellular (a) and intracellular (b) domains of the  $\beta_2$ AR at basal level in heart microvessels from control Wistar, WKY rats and SHR. Numbers in the bars indicate rat group sizes. \* P < 0.05 and \*\* P < 0.01 vs Wistar; # P < 0.05 and ### P < 0.01 vs WKY. Micrographs showing the intensity of the avidin-biotin-diaminobenzidine immuno-complexes for both the extracellular (c) and intracellular (d) domains of the  $\beta_2$ AR at basal level in heart microvessels from the same strains. Representative Western blots showing the expression of the  $\beta_2$ AR extracellular (e) and intracellular domains (f) and corresponding ponceau at basal level in heart from control WKY and SHR. The blots were selected as closest to the measured mean values from a single Western gel for all WKY and SHR samples and are separated by white space. For this, 40  $\mu$ g of proteins was used. \*\*\* P < 0.001 vs WKY. Bar = 10  $\mu$ m.
